# Supplementary material for: Risk factors associated with short term mortality changes over time, after arrival to the emergency department
Source: Scand J Trauma Resusc Emerg Med. 2018 Apr 20;26:29. doi: 10.1186/s13049-018-0493-2 (PMC5910601; doi:10.1186/s13049-018-0493-2)
Supplement: Supplementary file 1 — DEPT triage. Vital values. (XLSX 61.8 kb) [file 13049_2018_493_MOESM1_ESM.xlsx]

## Sheet: Ark1
	Adults and children above 11 years. Vital values. DEPT triage system
	1 RED lifethreatening	2 ORANGE urgent	3 YELLOW less urgent	4 GREEN not urgent
A	Not free airways. Inspiratory stridor.
B	SaO2 (arterial oxygen saturation) <90% with oxygen supply	SaO2 (arterial oxygen saturation) <95% with oxygen supply
	SaO2 (arterial oxygen saturation) <80% without oxygen supply	SaO2 (arterial oxygen saturation) <90% without oxygen supply	SaO2 (arterial oxygen saturation) <95% without oxygen supply	SaO2 (arterial oxygen saturation) ≥95% without oxygen supply
	Respiratory freq. >35 or <8	Respiratory freq.>30	Respiratory freq.>25	Respiratory freq. 8-25
C	Heart rate >140	Heart rate >120 or < 40	Heart rate >110 or <50	Heart rate 50-110
	Systolic Blood pressure < 80mmHG	Systolic Blood pressure < 90mmHG		Systolic Blood pressure ≥90mmHG
D	GCS <9	GCS 9-13	GCS =14	GCS =15
E	Temperature <32°C	Temperature >40 or 32-34°C	Temperature >38°C	Temperature 35-38°C
	For patients with COPD:
B	SaO2 (arterial oxygen saturation) <85% with oxygen supply	SaO2 (arterial oxygen saturation) <85% with oxygen supply	SaO2 (arterial oxygen saturation) <90% without oxygen supply	SaO2 (arterial oxygen saturation) ≥90% without oxygen supply
	SaO2 (arterial oxygen saturation) <75% without oxygen supply	SaO2 (arterial oxygen saturation) <75% without oxygen supply
